# Supplementary material for: Protease-controlled secretion and display of intercellular signals
Source: PubMed Central journal article supplement (PMC8854555; doi:10.1038/s41467-022-28623-y), 2022-02-17
Supplement: 41467_2022_28623_MOESM4_ESM.pdf [file 41467_2022_28623_MOESM4_ESM.pdf]

**Title:** Supplementary Data 1:

**Description:** Experimental details.

**Title:** Supplementary Data 2:

**Description:** List of plasmids and the amounts used in this study.
