# Supplementary material for: Protease-controlled secretion and display of intercellular signals
Source: Nat Commun. 2022 Feb 17;13:912. doi: 10.1038/s41467-022-28623-y (PMC8854555; doi:10.1038/s41467-022-28623-y)
Supplement: Supplementary file 5 — Supplementary Data 1 [file 41467_2022_28623_MOESM5_ESM.xlsx]

## Sheet: Supplementary Data 1
Fig Index	RELEASE Construct	Protease Constructs	Misc. Constructs	Inducers (when adminstered)	Assay Used to Measure Output
1c	CMVTO-SEAP-26Sfur-3TM-tevs-AAMP		CMVTO-g0	DOX (at transfection)	SEAP Assay
	CMVTO-SEAP-26Sfur-3TM-tevs-KKMP		CMVTO-H2b-Che
1d	CMVTO-SEAP-26Sfur-3TM-tevs-KKMP	CMVTO-TEVP	CMVTO-g0	DOX (at transfection)	SEAP Assay
	CMVTO-SEAP-26Sfur-3TM-hcvs-KKMP	CMVTO-HCVP	CMVTO-H2b-Che
1e	CMVTO-SEAP-26Sfur-3TM-hcvs-KKMP	CMVTO-HCVP	CMVTO-g0	DOX (at transfection)	SEAP Assay
	CMVTO-SEAP-26Sfur-3TM-hcvs-KKMP (GS)		CMVTO-H2b-Che
	CMVTO-SEAP-26Sfur-B2AD-hcvs-KKMP
	CMVTO-SEAP-26Sfur-B2AD-hcvs-KKMP (GS)
1f	CMVTO-SEAP-26sfur-3TM-tevs-KKMP	CMVTO-p450-FKBP-nTEVP	CMVTO-g0	DOX (at transfection)	SEAP Assay
		CMVTO-p450-FRB-cTEVP	CMVTO-H2b-Che	Rapalog (at transfection)
1h	CMVTO-GFP-ECL-3TM-tevs-KKMP V3	CMVTO-TEVP	CMVTO-g0	DOX (at transfection)	Flow Cytometry
	CMVTO-GFP-ECL-3TM-hcvs-KKMP	CMVTO-HCVP	CMVTO-H2b-Che
2b	CMVTO-SEAP-26Sfur-3TM-tevs-KKMP	CMVTO-TEVP	CMVTO-g0	DOX (at transfection)	SEAP Assay
	CMVTO-GFP-26Sfur-3TM-hcvs-KKMP	CMVTO-HCVP	CMVTO-H2b-Che		Flow Cytometry
			CMVTO-Gbp6-TM-Che
2c	CMVTO-SEAP-26sFur-B2AD-hcvs-tevs-KKMP	CMVTO-TEVP	CMVTO-g0	DOX (at transfection)	SEAP Assay
		CMVTO-HCVP	CMVTO-H2b-Che
2d	CMVTO-p450-hcvs-B2AD2-26Sfur-SEAP-26sFur-B2AD-tevs-KKMP	CMVTO-TEVP	CMVTO-g0	DOX (at transfection)	SEAP Assay
		CMVTO-HCVP	CMVTO-H2b-Che
2f	CMVTO-SEAP-26SFur-B2AD-tvmvs-KKMP	CMVTO-nTVMVP-AP4-tevs-P3-tevs-cTVMVPmut	CMVTO-g0	DOX (at transfection)	SEAP Assay
		CMVTO-nTVMVPmut-tevs-AP4-tevs-P3-cTVMVP	CMVTO-H2b-Che
		CMVTO-TEVP
3b	CMVTO-IL12-26Sfur-B2AD-tvmvs-KKMP	CMVTO-TVMVP	CMVTO-g0	DOX (at transfection)	IL-12 ELISA
			CMVTO-H2b-Che
3d, e	CMVTO-mCherry-Kir2.1-HA-tevs-RXR	CMVTO-TEVP	pCAGGS-ASAP3	DOX (at transfection)	Flow Cytometry
			CMVTO-g0
			CMVTO-BFP
3f	CMVTO-GFP-Kir2.1-HA-tevs-RXR-v2	CMVTO-TEVP	CMVTO-g0	DOX (at transfection)	Flow Cytometry
			CMVTO-BFP
4c	CMVTO-SEAP-26SFur-B2AD-tvmvs-KKMP	CMVTO-nTVMVP-AP4-tevs-P3-tevs-cTVMVPmut	CMVTO-g0	DOX (at transfection)	SEAP Assay
		CMVTO-nTVMVPmut-tevs-AP4-tevs-P3-cTVMVP	CMVTO-H2b-Che
		CMVTO-nTVMVp-AP4-tevs-P3-tevs-cTVMVPmut-CAAX	CMVTO-HRAS-G12V
		CMVTO-P3-cTVMVP
		CMVTO-p450-P3-cTVMVP
		CMVTO-RBDK65E-nTEVp
		CMVTO-RBDK65E-cTEVp
4e	CMVTO-SEAP-26SFur-B2AD-tvmvs-KKMP	CMVTO-Fyn-nTVMVpmut-tevs-AP4-tevs-P3-cTVMVp	CMVTO-g0	DOX (at transfection)	SEAP Assay
		CMVTO-p450-nTVMVp-AP4	CMVTO-H2b-Che
		CMVTO-RBDK65E-nTEVp	CMVTO-KRAS
		CMVTO-RBDK65E-cTEVp	CMVTO-KRAS-G12V
		CMVTO-RBDK65E-R89L-nTEVp
		CMVTO-RBDK65E-R89L-cTEVp
5b	CMVTO-SEAP-26SFur-B2AD-tvmvs-KKMP	CMVTO-p450-nTVMVp-AP4	CMVTO-g0	DOX (at transfection)	SEAP Assay
		CMVTO-Fyn-nTVMVpmut-tevs-AP4-tevs-P3-cTVMVp	CMVTO-H2b-Che	Rapalog (at transfection)
		CMVTO-FKBP-GpA-nTEVp
		CMVTO-FRB-CD28-cTEVp
5c	CMVTO-IL12-26Sfur-B2AD-tvmvs-KKMP	CMVTO-p450-nTVMVp-AP4	CMVTO-g0	DOX (at transfection)	IL-12 ELISA
		CMVTO-Fyn-nTVMVpmut-tevs-AP4-tevs-P3-cTVMVp	CMVTO-H2b-Che
		CMVTO-RBDK65E-nTEVp	CMVTO-KRAS-G12V
		CMVTO-RBDK65E-cTEVp
5d	CMVTO-IL12-26Sfur-B2AD-tvmvs-KKMP	CMVTO-p450-nTVMVp-AP4	CMVTO-g0	DOX (at transfection)	IL-12 ELISA
		CMVTO-Fyn-nTVMVpmut-tevs-AP4-tevs-P3-cTVMVp	CMVTO-H2b-Che	Rapalog (at transfection)
		CMVTO-FKBP-GpA-nTEVp
		CMVTO-FRB-CD28-cTEVp
5e	CMVTO-mCherry-Kir2.1-HA-tvmvs-RXR-V2	CMVTO-p450-nTVMVp-AP4	CMVTO-g0	DOX (at transfection)	Flow Cytometry
		CMVTO-Fyn-nTVMVpmut-tevs-AP4-tevs-P3-cTVMVp	CMVTO-H2b-Che	Rapalog (at transfection)
		CMVTO-FKBP-GpA-nTEVp	pCAGGS-ASAP3
		CMVTO-FRB-CD28-cTEVp
5g	CMVTO-SEAP-26SFur-B2AD-tvmvs-KKMP	CMVTO-p450-nTVMVp-hcvs-AP4	CMVTO-g0	DOX (at transfection)	SEAP Assay
		CMVTO-Fyn-nTVMVpmut-tevs-AP4-tevs-P3-cTVMVp	CMVTO-H2b-Che
		CMVTO-RBDK65E-nTEVp	CMVTO-KRAS-G12V
		CMVTO-RBDK65E-cTEVp
		CMVTO-p450-Ns4A-tv-HCVp-P3
S1b	CMVTO-SEAP-26SFur-B2AD-tvmvs-KKMP	CMVTO-TVMVP	CMVTO-g0	DOX (at transfection)	SEAP Assay
			CMVTO-H2b-Che
S2b	CMVTO-p450-hcvs-B2AD2-26Sfur-SEAP	CMVTO-HCVP	CMVTO-g0	DOX (at transfection)	SEAP Assay
			CMVTO-H2b-Che
S3a	CMVTO-SEAP-26Sfur-3TM-tevs-KKMP	CMVTO-TEVP	CMVTO-g0	DOX (at transfection)	SEAP Assay
	CMVTO-SEAP-26Sfur-B2AD-tevs-KKMP		CMVTO-H2b-Che
S3c	CMVTO-SEAP-26SFur-B2AD-tevs-KKMP	CMVTO-p450-FKBP-nTEVP	CMVTO-g0	DOX (at transfection)	SEAP Assay
		CMVTO-p450-FRB-cTEVP	CMVTO-H2b-Che	Rapalog (at transfection)
S3d	CMVTO-SEAP-26sFur-3TM-tevs-KKMP	CMVTO-p450-FKBP-nTEVP	CMVTO-g0	DOX (at transfection)	SEAP Assay
		CMVTO-p450-FRB-cTEVP	CMVTO-H2b-Che	Rapalog (at transfection)
S4b	/	/	CMVTO-SEAP	DOX (48 hours after transfection)	SEAP Assay
			CMVTO-g0
			CMVTO-H2b-Che
S4c	CMVTO-SEAP-26sFur-3TM-tevs-KKMP	CMVTO-p450-FKBP-nTEVP	CMVTO-g0	DOX (at transfection)	SEAP Assay
		CMVTO-p450-FRB-cTEVP	CMVTO-H2b-Che	Rapalog (48 hours after transfection
S4d	CMVTO-SEAP-26sFur-3TM-tevs-KKMP	CMVTO-p450-FKBP-nTEVP	CMVTO-g0	DOX (at transfection)	SEAP Assay
		CMVTO-p450-FRB-cTEVP	CMVTO-H2b-Che	Rapalog (48 hours after transfection
			CMVTO-Furin
S5	CMVTO-GFP-ECL-3TM-tevs-KKMP V3	CMVTO-TEVP	CMVTO-g0	Dox (at transfection)	Flow Cytometry
			CMVTO-H2b-Che
S6b	CMVTO-SEAP-26Sfur-B2AD-SpyTag-tvmvs-KKMP	CMVTO-p450-hcvs-SpyCatcher	CMVTO-g0	DOX (at transfection)	SEAP Assay
		CMVTO-HCVP	CMVTO-H2b-Che
		CMVTO-TVMVP
S7c	CMVTO-gfp-Kir2.1-HA-tevs-RXR-V2	CMVTO-TEVP	CMVTO-g0	DOX (at transfection)	Flow Cytometry
	CMVTO-gfp-Kir2.1-HA-tevs-KKYL		CMVTO-BFP
S8b	CMVTO-SEAP-26Sfur-B2AD-tevs-KKMP	CMVTO-RBDK65E-nTEVp	CMVTO-g0	DOX (at transfection)	SEAP Assay
		CMVTO-RBDK65E-cTEVp	CMVTO-H2b-Che
			CMVTO-HRAS-G12V
S9b	CMVTO-SEAP-26Sfur-B2AD-tvmvs-KKMP	CMVTO-RBD-K65E-nTEVP	CMVTO-g0	DOX (at transfection)	SEAP Assay
		CMVTO-RBDK65E-cTEVp	CMVTO-H2b-Che
		CMVTO-p450-P3-cTVMVP	CMVTO-HRAS-G12V
		CMVTO-nTVMVp-AP4-tevs-P3-tevs-cTVMVPmut-CAAX
S9c	CMVTO-SEAP-26Sfur-B2AD-tvmvs-KKMP	CMVTO-RBD-K65E-nTEVP	CMVTO-g0	DOX (at transfection)	SEAP Assay
		CMVTO-RBDK65E-cTEVp	CMVTO-H2b-Che
		CMVTO-p450-P3-cTVMVP	CMVTO-HRAS-G12V
		CMVTO-nTVMVp-AP4-tevs-P3-tevs-cTVMVPmut-CAAX	CMVTO-KRAS-G12V
S9d	CMVTO-SEAP-26Sfur-B2AD-tvmvs-KKMP	CMVTO-RBD-K65E-nTEVP	CMVTO-g0	DOX (at transfection)	SEAP Assay
		CMVTO-RBDK65E-cTEVp	CMVTO-H2b-Che
		CMVTO-p450-P3-cTVMVP	CMVTO-HRAS-G12V
		CMVTO-nTVMVp-AP4-tevs-P3-tevs-cTVMVPmut-CAAX	CMVTO-KRAS-G12V
		CMVTO-Fyn-nTVMVpmut-tevs-AP4-tevs-P3-cTVMVp
		CMVTO-Lyn-nTVMVpmut-tevs-AP4-tevs-P3-cTVMVp
		CMVTO-p450-nTVMVp-AP4
S9e	CMVTO-SEAP-26Sfur-B2AD-tvmvs-KKMP	CMVTO-RBD-K65E-nTEVP	CMVTO-g0	DOX (at transfection)	SEAP Assay
		CMVTO-RBDK65E-cTEVp	CMVTO-H2b-Che
		CMVTO-Fyn-nTVMVpmut-tevs-AP4-tevs-P3-cTVMVp	CMVTO-KRAS-G12V
		CMVTO-p450-nTVMVp-AP4
S9f	CMVTO-SEAP-26Sfur-B2AD-tvmvs-KKMP	CMVTO-RBD-K65E-nTEVP	CMVTO-g0	DOX (at transfection)	SEAP Assay
		CMVTO-RBDK65E-cTEVp	CMVTO-H2b-Che
		CMVTO-Fyn-nTVMVpmut-tevs-AP4-tevs-P3-cTVMVp	CMVTO-KRAS-G12V
		CMVTO-p450-nTVMVp-AP4	CMVTO-KRAS-G12C
			CMVTO-KRAS-G12D
S10b	N/A	N/A	CMVTO-HA-GFP	DOX (at transfection)	Flow Cytometry
			CMVTO-SEAP
			CMVTO-Gbp6-TM-Che
S10c	CMVTO-SEAP-26Sfur-3TM-tevs-KKMP	CMVTO-TEVP	CMVTO-g0	DOX (at transfection)	SEAP Assay
	CMVTO-GFP-26Sfur-3TM-hcvs-KKMP	CMVTO-HCVP	CMVTO-H2b-Che		Flow Cytometry
			CMVTO-Gbp6-TM-Che
S11a	CMVTO-gfp-Kir2.1-HA-tevs-RXR-V2	CMVTO-TEVP	CMVTO-g0	DOX (at transfection)	Flow Cytometry
	CMVTO-gfp-Kir2.1-HA-tevs-KKYL		CMVTO-BFP
S11b	CMVTO-mCherry-Kir2.1-HA-tevs-RXR	CMVTO-TEVP	pCAGGS-ASAP3	DOX (at transfection)	Flow Cytometry
	CMVTO-GFP-Kir2.1-HA-tevs-RXR-v2		CMVTO-g0
			CMVTO-BFP
S11c	CMVTO-mCherry-Kir2.1-HA-tvmvs-RXR-V2	CMVTO-p450-nTVMVp-AP4	CMVTO-g0	DOX (at transfection)	Flow Cytometry
		CMVTO-Fyn-nTVMVpmut-tevs-AP4-tevs-P3-cTVMVp	CMVTO-H2b-Che	Rapalog (at transfection)
		CMVTO-FKBP-GpA-nTEVp	pCAGGS-ASAP3
		CMVTO-FRB-CD28-cTEVp
Supplementary Data 1: Experimental Details
